# Supplementary material for: A Case Report of Secondary Syphilis Co-Infected with Measles: A Diagnostic Dilemma with Fever and Rash
Source: MDPI journal article supplement (doi:10.3390/tropicalmed7050070), 2022-05-09
Supplement: s1 [file s1]

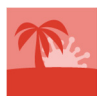

*Case Report*

# A Case Report of Secondary Syphilis Co-infected with Measles: a Diagnostic Dilemma with Fever and Rash.

Hisham Ahmed Imad <sup>1,2,3\*</sup>, Ploi Lakanavisid <sup>2,4</sup>, Phimphan Pisutsan <sup>2,5</sup>, Kentaro Trerattanavong <sup>6</sup>, Thundon Ngamprasertchai <sup>2,5</sup>, Wasin Matsee <sup>2,5</sup>, Watcharapong Piyaphanee <sup>2,5</sup>, Pornsawan Leaungwutiwong <sup>7,8</sup>, Wang Nguitragool <sup>1,9</sup>, Emi E. Nakayama <sup>3</sup> and Tatsuo Shioda <sup>3</sup>

<sup>1</sup> Mahidol Vivax Research Unit, Faculty of Tropical Medicine, Mahidol University, Bangkok 10400, Thailand; wang.ngu@mahidol.edu (W.N.)

<sup>2</sup> Thai Travel Clinic, Hospital for Tropical Diseases, Faculty of Tropical Medicine, Mahidol University, Bangkok 10400, Thailand; ploi.la@go.buu.ac.th (P.L.); phimphan@thaitravelclinic.com (P.P.); thundon.ngm@mahidol.ac.th (T.N.); wasin.mat@mahidol.edu (W.M.); watcharapong.piy@mahidol.ac.th (W.P.)

<sup>3</sup> Center for Infectious Disease Education and Research, Department of Viral Infections, Research Institute for Microbial Diseases, Osaka University, Suita 565-0871, Osaka, Japan; emien@biken.osaka-u.ac.jp (E.E.N.); shioda@biken.osaka-u.ac.jp (T.S.)

<sup>4</sup> Department of Preventive Medicine and Family Medicine, Faculty of Medicine, Burapha University, Chonburi 20130, Thailand

<sup>5</sup> Department of Clinical Tropical Medicine, Faculty of Tropical Medicine, Mahidol University, Bangkok 10400, Thailand

<sup>6</sup> Hull York Medical School, University road, Heslington, York, YO10 5DD, UK; hykt2@hyms.ac.uk (K.T.)

<sup>7</sup> Tropical Medicine Diagnostic Reference Laboratory, Faculty of Tropical Medicine, Mahidol University, Bangkok 10400, Thailand; pornsawan.lea@mahidol.ac.th (P.L.)

<sup>8</sup> Department of Microbiology and Immunology, Faculty of Tropical Medicine, Mahidol University, Bangkok 10400, Thailand

<sup>9</sup> Department of Molecular Tropical Medicine and Genetics, Faculty of Tropical Medicine, Mahidol University, Bangkok 10400, Thailand

\* Correspondence: hishamahmed.ima@mahidol.ac; Tel.: +66-631501402

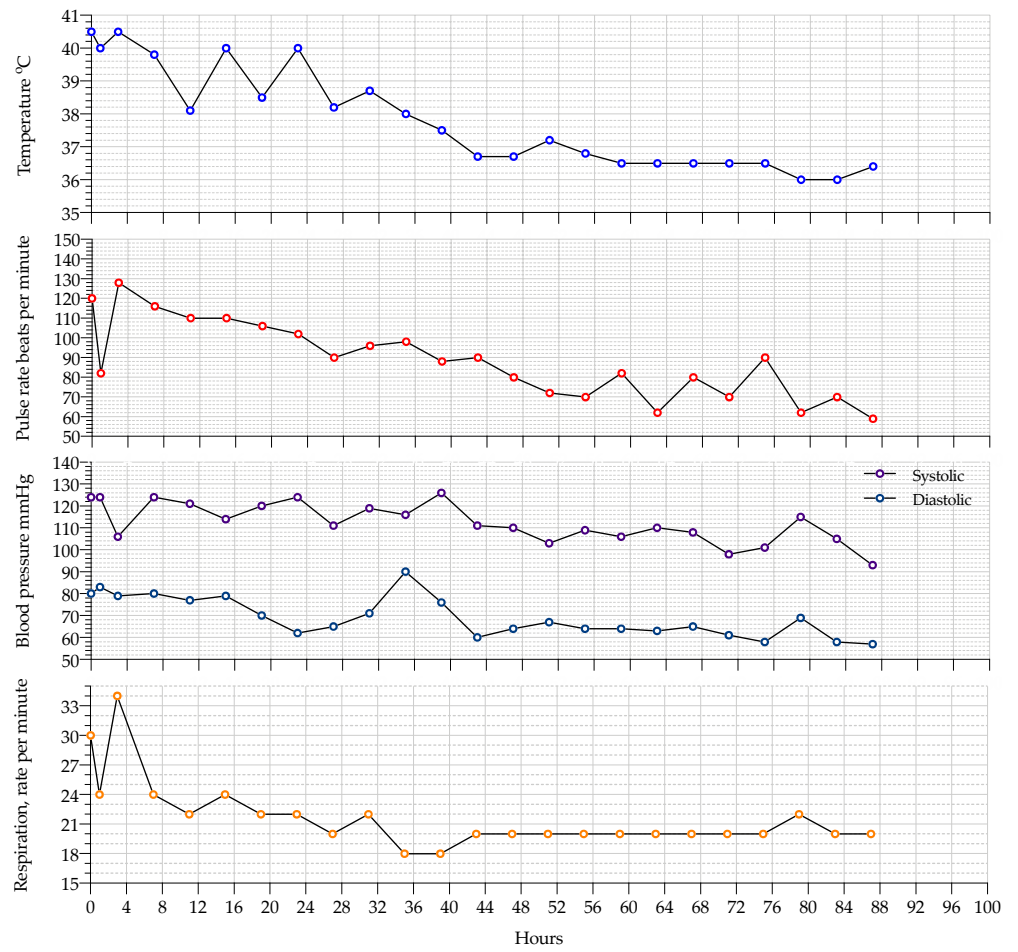

**Figure S1.** The kinetics of vital signs parameters demonstrating the clinical course of the illness.
